# Supplementary material for: Agonists and knockdown of estrogen receptor β differentially affect invasion of triple-negative breast cancer cells in vitro
Source: PubMed Central journal article supplement (PMC5178087; doi:10.1186/s12885-016-2973-y), 2016-12-21
Supplement: 12885_2016_2973_MOESM1_ESM.pdf [file 12885_2016_2973_MOESM1_ESM.pdf]

## Supplemental file S1

PCR primer sequences used for *real* RT-qPCR

| Gene        | Primer (5'-3')                                  |
|-------------|-------------------------------------------------|
| ER $\alpha$ | CACATGAGTAACAAAGGCATGG<br>ATGAAGTAGAGCCCGCAGTG  |
| ER $\beta$  | GGCATGCGAGTAACAAGGGC<br>GGGAGCCCTCTTTGCTTTT     |
| PR          | CAACTACCTGAGGCCGGATT<br>CATTGCCCTCTTAAAGAAGACCT |
| HER2        | CATGGTCAAATGTTGGATGATT<br>CCTCATTCTGGATGACCACA  |
| EGFR        | CGAGGGCAAATACAGCTT<br>AAATTCACCAATACCTATT       |
